# Supplementary material for: Ningxin-Tongyu-Zishen formula alleviates the senescence of granulosa cells on D-galactose-induced premature ovarian insufficiency mice
Source: publisher site journal article supplement (doi:10.18632/aging.205607), 2024-02-28
Supplement: Supplementary file [file aging-v16i5-205607-supplementary-material-SD1.pdf]

**SUPPLEMENTARY FIGURE**

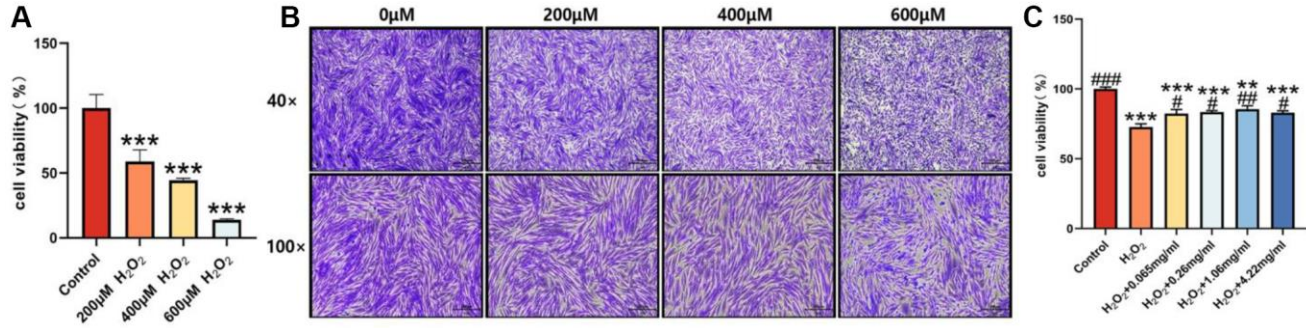

**Supplementary Figure 1. The concentration of H<sub>2</sub>O<sub>2</sub> and NTZF treated KGN cells was screened. (A)** CCK-8 was used to detect the effect of different H<sub>2</sub>O<sub>2</sub> concentrations on the cell viability of KGN cells. **(B)** Crystal violet staining was used to detect the effect of different H<sub>2</sub>O<sub>2</sub> concentrations on the morphology of KGN cells. **(C)** CCK-8 was used to detect the effect of different NTZF concentrations on the cell viability of KGN cells. (\**p* < 0.05, \*\**p* < 0.01, \*\*\**p* < 0.001, versus control group, *n* = 3; #*p* < 0.05, ###*p* < 0.01, ###*p* < 0.001, versus H<sub>2</sub>O<sub>2</sub> group, *n* = 3).
