# Supplementary material for: Ningxin-Tongyu-Zishen formula alleviates the senescence of granulosa cells on D-galactose-induced premature ovarian insufficiency mice
Source: publisher site journal article supplement (doi:10.18632/aging.205607), 2024-02-28
Supplement: Supplementary file [file aging-v16i5-205607-supplementary-material-SD2.pdf]

## SUPPLEMENTARY TABLES

**Supplementary Table 1-1. The content of compounds in Chinese medicinals.**

| No. | Chinese medicinals             | Adenosine (ng/mL) | Gallic acid (ng/mL) | Hydroxymethyl-2-furaldehyde+ (ng/mL) | Magnoflorine (ng/mL) | Caffeic acid (ng/mL) | (+)-Catechin (ng/mL) |
|-----|--------------------------------|-------------------|---------------------|--------------------------------------|----------------------|----------------------|----------------------|
| 1   | Rehmanniae Radix Praeparata    | 3086.64           | BLQ <sup>a</sup>    | 34948.03                             | 9.00                 | 2076.73              | BLQ                  |
| 2   | Testudinis Carapax et Plastrum | 34.51             | BLQ                 | BLQ                                  | 11.83                | CL <sup>b</sup>      | 4.05                 |
| 3   | Codonopsis Radix               | 3857.18           | 54.15               | 815.03                               | 13.99                | 60.16                | 3.71                 |
| 4   | Cuscutae Semen                 | 1331.49           | BLQ                 | BLQ                                  | 69.25                | 4685.41              | 5.63                 |
| 5   | Codonopsis Radix               | 18231.81          | 122.44              | BLQ                                  | 2.86                 | BLQ                  | 8.31                 |
| 6   | Ziziphi Spinosae Semen         | 1277.19           | 132.59              | BLQ                                  | 11568.27             | 13.39                | 1810.77              |
| 7   | Moutan Cortex                  | 3359.06           | 61548.67            | BLQ                                  | 1.31                 | 219.79               | 6317.66              |
| 8   | Paeoniae Radix Alba            | 4203.01           | 35871.30            | 2489.85                              | 36.05                | BLQ                  | 3097.82              |
| 9   | Dioscoreae Rhizoma             | 41.09             | BLQ                 | BLQ                                  | 0.74                 | 16.30                | 16.47                |
| 10  | Bupleuri Radix                 | 2222.11           | BLQ                 | BLQ                                  | 1.09                 | BLQ                  | 17.85                |

**Supplementary Table 1-2. The content of compounds in Chinese medicinals.**

| No. | Chinese medicinals             | Chlorogenic acid (ng/mL) | Paeoniflorin (ng/mL) | Ferulic acid (ng/mL) | Quercetin (ng/mL) | Isorhamnetin (ng/mL) | Linoleic acid (ng/mL) |
|-----|--------------------------------|--------------------------|----------------------|----------------------|-------------------|----------------------|-----------------------|
| 1   | Rehmanniae Radix Praeparata    | CL                       | BLQ                  | 1074.98              | CL                | CL                   | —                     |
| 2   | Testudinis Carapax et Plastrum | CL                       | 44.98                | BLQ                  | CL                | CL                   | BLQ                   |
| 3   | Codonopsis Radix               | 61.24                    | CL                   | 133.84               | CL                | CL                   | BLQ                   |
| 4   | Cuscutae Semen                 | 11638.39                 | 2.16                 | BLQ                  | 426.01            | 34.17                | 612.76                |
| 5   | Codonopsis Radix               | 959.44                   | 38.98                | 5197.23              | CL                | CL                   | BLQ                   |
| 6   | Ziziphi Spinosae Semen         | CL                       | BLQ                  | BLQ                  | 86.23             | CL                   | 1424.52               |
| 7   | Moutan Cortex                  | CL                       | 44739.84             | 353.61               | 194.51            | 56.26                | BLQ                   |
| 8   | Paeoniae Radix Alba            | CL                       | 743855.01            | BLQ                  | CL                | CL                   | BLQ                   |
| 9   | Dioscoreae Rhizoma             | 5.17                     | 2.08                 | BLQ                  | CL                | CL                   | 687.53                |
| 10  | Bupleuri Radix                 | 152.24                   | CL                   | 356.68               | 299.62            | 112.34               | BLQ                   |

<sup>a</sup>CL indicates the presence of system residue, rendering the value here unreliable, which can be considered as worthless or below the lower limit of quantitation. <sup>b</sup>BLQ indicates to be lower than the lower limit of quantitation.

**Supplementary Table 2. The detail information of antibodies.**

| <b>Antibody</b>                                            | <b>Dilution ratio</b> | <b>Application</b> | <b>Catalog number</b> | <b>Producer details</b> |
|------------------------------------------------------------|-----------------------|--------------------|-----------------------|-------------------------|
| Sirt1                                                      | 1:200                 | IHC                | 13161-1-AP            | Proteintech             |
| p53                                                        | 1:100                 | IHC                | AF4663                | Affinity                |
| PCNA                                                       | 1:200                 | IHC                | 10205-2-AP            | Proteintech             |
| Enhanced enzyme-labeled goat anti-mouse/rabbit IgG polymer | –                     | IHC                | PV-9000               | ZSGB-BIO                |
| Sirt1                                                      | 1:100                 | IF                 | 13161-1-AP            | Proteintech             |
| p53                                                        | 1:50                  | IF                 | 10442-1-AP            | Proteintech             |
| Cy3-conjugated Affinipure Goat Anti-Rabbit IgG(H+L)        | 1:100                 | IF                 | SA00009-2             | Proteintech             |
| Sirt1                                                      | 1:500                 | WB-tissue          | 13161-1-AP            | Proteintech             |
| p53                                                        | 1:8000                | WB-tissue          | 10433-1-AP            | Proteintech             |
| GAPDH                                                      | 1:30000               | WB-tissue          | 10494-1-AP            | Proteintech             |
| PCNA                                                       | 1:10000               | WB-cell            | 10205-2-AP            | Proteintech             |
| γH2AX                                                      | 1:5000                | WB-cell            | ab81299               | Abcam                   |
| Sirt1                                                      | 1:3000                | WB-cell            | 13161-1-AP            | Proteintech             |
| p53                                                        | 1:5000                | WB-cell            | 10442-1-AP            | Proteintech             |
| p21                                                        | 1:2000                | WB-cell            | 10355-1-AP            | Proteintech             |
| GAPDH                                                      | 1:20000               | WB-cell            | 10494-1-AP            | Proteintech             |
| HRP-conjugated Affinipure Goat Anti-Mouse IgG(H+L)         | 1:8000                | WB-tissue, cell    | SA00001-1             | Proteintech             |
| HRP-conjugated Affinipure Goat Anti-Rabbit IgG(H+L)        | 1:5000                | WB-tissue, cell    | SA00001-2             | Proteintech             |
